# Supplementary material for: All for one and one for all: accommodating an extra electron in C60
Source: Royal Society of Chemistry journal article supplement (doi:10.1039/c4cp01447b), 2014-01-01
Supplement: c4cp01447b1.pdf [file c4cp01447b1.pdf]

# Supporting information for: ALL FOR ONE AND ONE FOR ALL: ACCOMMODATING AN EXTRA ELECTRON IN $C_{60}$

Shachar Klaiman,<sup>\*</sup> Evgeniy V. Gromov,<sup>\*</sup> and Lorenz S. Cederbaum

*Theoretische Chemie, Physikalisch-Chemisches Institut, Universität Heidelberg, Im Neuenheimer  
Feld 229, 69120 Germany*

E-mail: shachar.klaiman@pci.uni-heidelberg.de; evgeniy.gromov@pci.uni-heidelberg.de

In this work we analyze the charge difference densities of the electronically stable states of the  $C_{60}^-$  anion. All calculations were performed using the geometry of the neutral  $C_{60}$  molecule with CC bond lengths of 1.458 Å and 1.401 Å taken from an electron diffraction measurement.<sup>1</sup> The densities for the  $C_{60}^-$  anion's states were obtained from our equation-of-motion electron-affinity coupled-cluster singles and doubles (EOM-EA-CCSD) calculations. For the neutral  $C_{60}$ , the CCSD density was used. All coupled cluster calculation were performed using CFOUR.<sup>2</sup>

We use a basis comprised of the cc-pVDZ<sup>3</sup> basis set augmented with one diffuse s-type function on the atoms, taken from the corresponding augmented cc-pVDZ basis, and further augmented with 6 s-type, 6 p-type, and 6 d-type diffuse functions positioned at the center of the fullerene. We denote this basis set as DZ(+s)+6s6p6d. This basis set includes a total of 954 spherical Gaussian basis functions. The exponents of the centrally-centered diffuse function are given in Table S1.

In order to construct the density of the anionic states and the neutral  $C_{60}$  we had to prepare our own program which could construct the density from the MOLDEN output created in our

---

<sup>\*</sup>To whom correspondence should be addressed

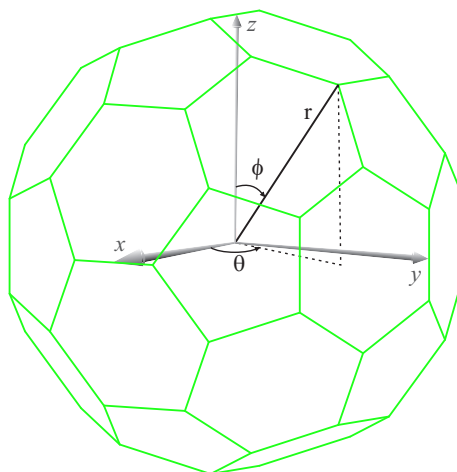

Figure S1: Orientation of  $C_{60}$  with respect to Cartesian coordinates and the definition of spherical coordinates used in this work.

Table S1: Even-tempered exponents of the diffuse basis functions placed at the center of the  $C_{60}$  molecule. The same exponents were used for the s-type, p-type, and d-type Gaussian type functions.

|   | s/p/d exponents |
|---|-----------------|
| 1 | 1.00000000      |
| 2 | 0.28571429      |
| 3 | 0.08163265      |
| 4 | 0.02332362      |
| 5 | 0.00666389      |
| 6 | 0.00190397      |

computations using the CFOUR package.<sup>2</sup> The necessity for a special program grew out of two major restrictions of any of the available programs. First most of them could not handle the very large output files created for  $C_{60}$  in such a large basis set and second we discuss in the manuscript, we desired to have a spherical representation of the density rather than on a rectangular grid which is also not readily supported. Since the value of the density at each grid point is independent of its value at other grid points, a straight forward parallelization resulted in a linear speed-up and we could easily converge the grid used. We also mention that we found it more convenient to work with a WFN format rather than directly with the MOLDEN output and, therefore, first transformed the output using the molden2aim package.<sup>4</sup>

## References

- (1) Hedberg, K.; Hedberg, L.; Bethune, D. S.; Brown, C. A.; Dorn, H. C.; Johnson, R. D.; De Vries, M. Bond Lengths in Free Molecules of Buckminsterfullerene,  $C_{60}$ , from Gas-Phase Electron Diffraction. *Science* **1991**, 254, 410412.
- (2) Stanton, J. F.; Gauss, J.; Harding, M. E.; Szalay, P. G. CFOUR, Coupled Cluster Techniques for Computational Chemistry. <http://www.cfour.de> (2010).
- (3) Dunning, T. H., Jr. Gaussian Basis Sets for use in Correlated Molecular Calculations. I. The Atoms Boron through Neon and Hydrogen. *J. Chem. Phys.* **1989**, 90, 10071023.
- (4) Molden2AIM v2.0.0. <http://people.smu.edu/wzou/>.
